# Supplementary material for: Competition between activation energy and migration entropy in lithium ion conduction in superionic NASICON-type Li1−3xGaxZr2(PO4)3
Source: Royal Society of Chemistry journal article supplement (doi:10.1039/d0ta11192a), 2021-01-01
Supplement: d0ta11192a1.pdf [file d0ta11192a1.pdf]

## Competition between activation energy and migration entropy in lithium ion conduction in superionic NASICON-type $\text{Li}_{1-3x}\text{Ga}_x\text{Zr}_2(\text{PO}_4)_3$

### Supporting information

Shanshan Duan,<sup>a</sup> Can Huang,<sup>a</sup> Min, Liu,<sup>b</sup> Zhiwen Cao,<sup>a</sup> Xiaocong Tian,<sup>a</sup> Shuen Hou,<sup>a</sup> Jiangyu Li,<sup>c</sup>  
Boyuan Huang,<sup>dc\*</sup> Hongyun Jin<sup>a\*</sup>

<sup>a</sup> Engineering Research Center of Nano-Geomaterials of Ministry of Education, Faculty of Materials Science and Chemistry, China University of Geosciences, Wuhan 430074, China.

<sup>b</sup> Department of Technology Centre of Dongfeng Motor Group Co. LTD, Wuhan, 430058, China.

<sup>c</sup> Department of Materials Science and Engineering, Southern University of Science and Technology, Shenzhen 518055, Guangdong, China

<sup>d</sup> Academy for Advanced Interdisciplinary Studies, Southern University of Science and Technology, Shenzhen 518055, Guangdong, China.

\* E-mail: [jinhongyun@cug.edu.cn](mailto:jinhongyun@cug.edu.cn), [huangby@sustech.edu.cn](mailto:huangby@sustech.edu.cn)

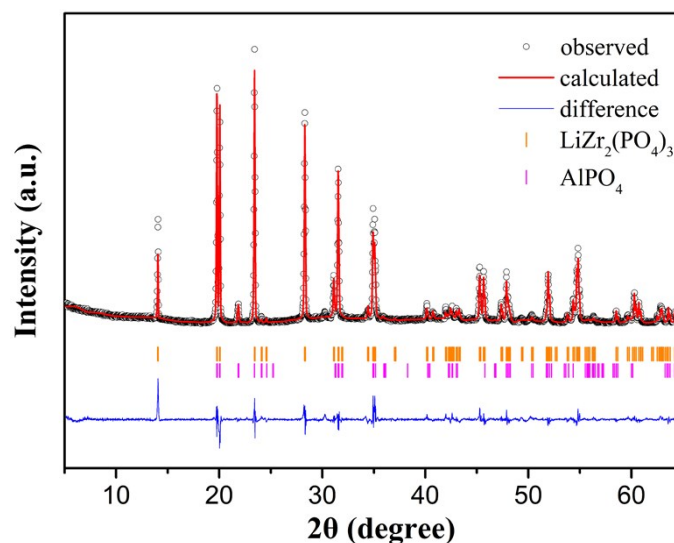

**Figure S1** Rietveld refinement of  $\text{LiZr}_2(\text{PO}_4)_3$ , experimental data are shown as points; the red line denotes the calculated pattern; and the difference profile is shown in blue.

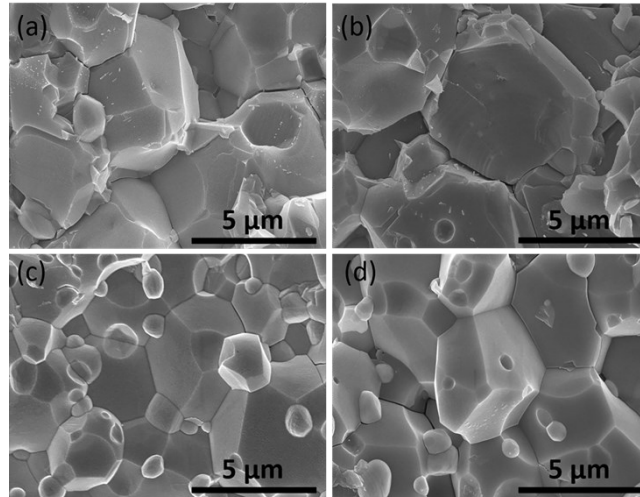

**Figure S2** SEM images of (a)  $\text{LiZr}_2(\text{PO}_4)_3$ , (b)  $\text{Li}_{0.94}\text{Ga}_{0.02}\text{Zr}_2(\text{PO}_4)_3$ , (c)  $\text{Li}_{0.85}\text{Ga}_{0.05}\text{Zr}_2(\text{PO}_4)_3$  and (d)  $\text{Li}_{0.7}\text{Ga}_{0.1}\text{Zr}_2(\text{PO}_4)_3$

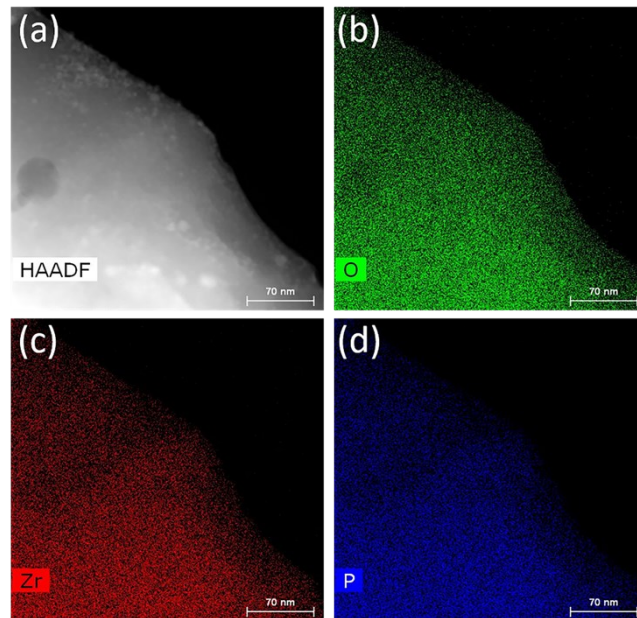

**Figure S3** (a) HAADF image and corresponding (b) O, (c) Zr, (d) P element mappings of  $\text{Li}_{0.85}\text{Ga}_{0.05}\text{Zr}_2(\text{PO}_4)_3$

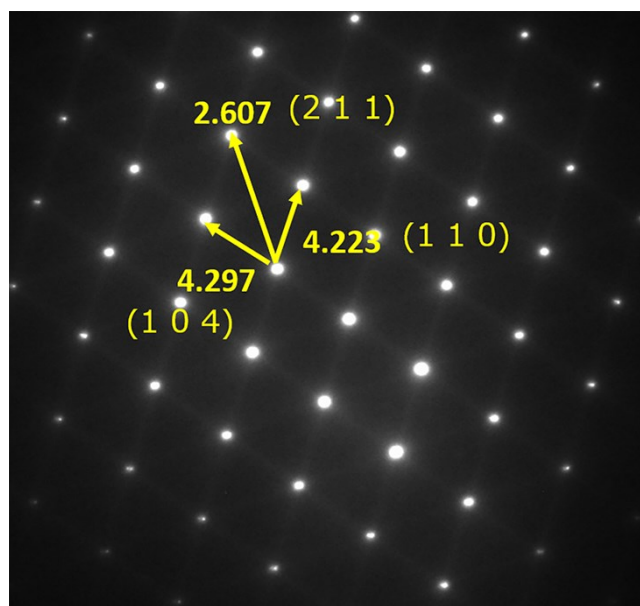

**Figure S4** Selected area electron diffraction pattern of  $\text{LiZr}_2(\text{PO}_4)_3$ .

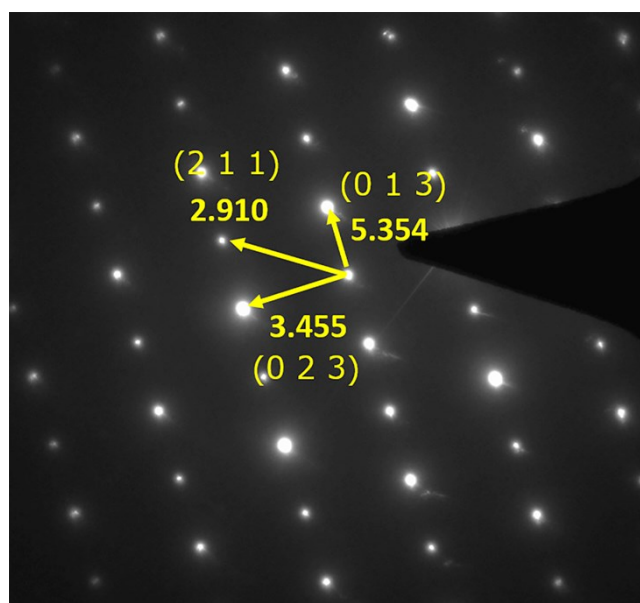

**Figure S5** Selected area electron diffraction pattern of  $\text{Li}_{0.85}\text{Ga}_{0.05}\text{Zr}_2(\text{PO}_4)_3$ .

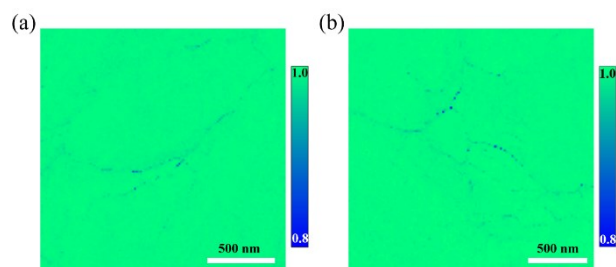

**Figure S6**  $R^2$  mappings of (a)  $\text{LiZr}_2(\text{PO}_4)_3$  and (b)  $\text{Li}_{0.85}\text{Ga}_{0.05}\text{Zr}_2(\text{PO}_4)_3$ .

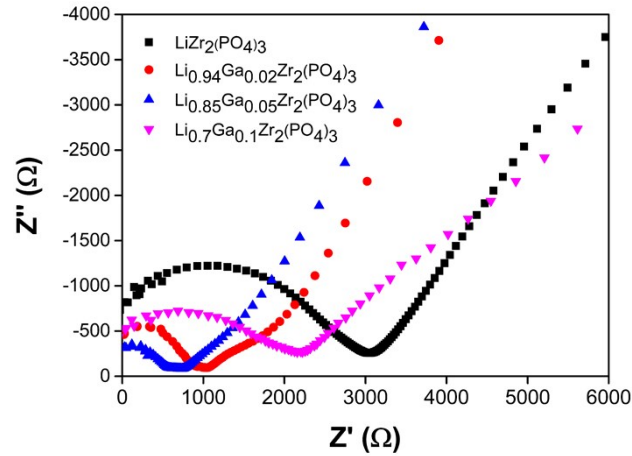

**Figure S7** Complex impedance plots measured at room temperature for  $\text{LiZr}_2(\text{PO}_4)_3$ ,  $\text{Li}_{0.94}\text{Ga}_{0.02}\text{Zr}_2(\text{PO}_4)_3$ ,  $\text{Li}_{0.85}\text{Ga}_{0.05}\text{Zr}_2(\text{PO}_4)_3$  and  $\text{Li}_{0.7}\text{Ga}_{0.1}\text{Zr}_2(\text{PO}_4)_3$ .

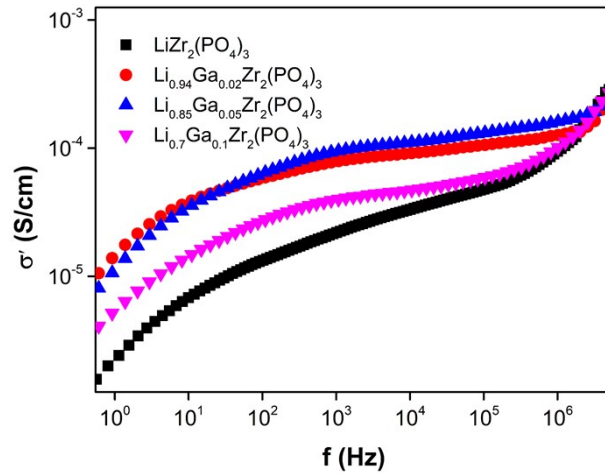

**Figure S8** Frequency-dependent ionic conductivity of the  $\text{Li}_{1-3x}\text{Ga}_x\text{Zr}_2(\text{PO}_4)_3$  ( $x=0, 0.02, 0.05, 0.1$ ) samples.

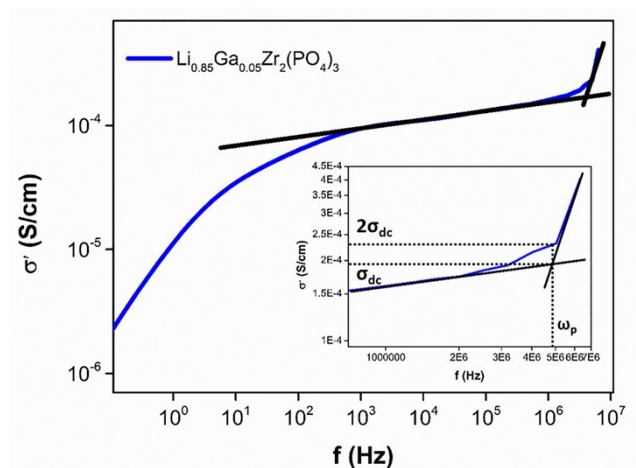

**Figure S9** A method of estimating jump frequency from  $\text{Li}_{0.85}\text{Ga}_{0.05}\text{Zr}_2(\text{PO}_4)_3$  a.c. conductivity data. The insert represents a larger version in high frequency.

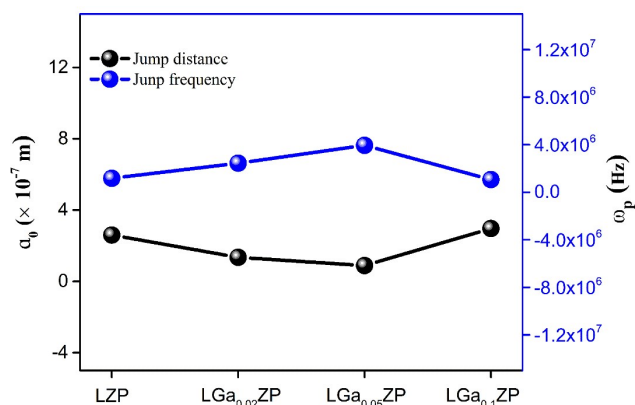

**Figure S10** Compositional dependence of the jump distance and jump frequency of the  $\text{Li}_{1-3x}\text{Ga}_x\text{Zr}_2(\text{PO}_4)_3$  ( $x=0, 0.02, 0.05, 0.1$ ) samples. Straight lines through data points are guides for the eye.

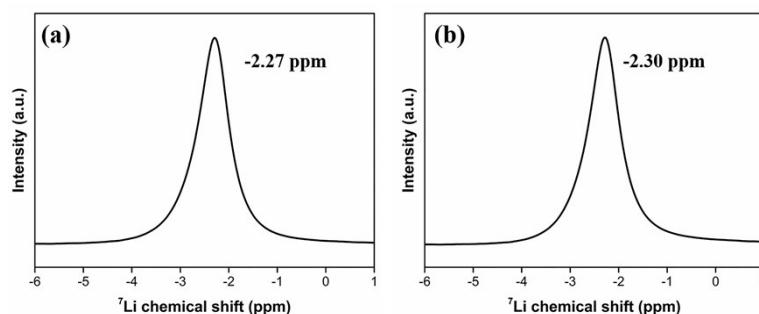

**Figure S11**  $^7\text{Li}$  MAS-NMR spectra of (a)  $\text{LiZr}_2(\text{PO}_4)_3$  and (b)  $\text{Li}_{0.85}\text{Ga}_{0.05}\text{Zr}_2(\text{PO}_4)_3$ .

**Table S1** Comparison of chemical analysis between  $\text{LiZr}_2(\text{PO}_4)_3$ ,  $\text{Li}_{0.94}\text{Ga}_{0.02}\text{Zr}_2(\text{PO}_4)_3$ ,  $\text{Li}_{0.85}\text{Ga}_{0.05}\text{Zr}_2(\text{PO}_4)_3$  and  $\text{Li}_{0.7}\text{Ga}_{0.1}\text{Zr}_2(\text{PO}_4)_3$  by ICP-OES

| Sample                                                       | Li (wt.%) | Zr (wt.%) | P (wt.%) | Ga (wt.%) | Al (wt.%) |
|--------------------------------------------------------------|-----------|-----------|----------|-----------|-----------|
| $\text{LiZr}_2(\text{PO}_4)_3$                               | 1.38      | 37.7      | 19.9     | \         | 0.613     |
| $\text{Li}_{0.94}\text{Ga}_{0.02}\text{Zr}_2(\text{PO}_4)_3$ | 1.27      | 37.2      | 19.4     | 0.251     | 0.529     |
| $\text{Li}_{0.85}\text{Ga}_{0.05}\text{Zr}_2(\text{PO}_4)_3$ | 1.11      | 36.5      | 18.8     | 0.683     | 0.507     |
| $\text{Li}_{0.7}\text{Ga}_{0.1}\text{Zr}_2(\text{PO}_4)_3$   | 0.945     | 36.7      | 19.2     | 1.36      | 0.563     |

**Table S2** Rietveld refinements for  $\text{LiZr}_2(\text{PO}_4)_3$  and  $\text{Li}_{0.85}\text{Ga}_{0.05}\text{Zr}_2(\text{PO}_4)_3$

| Sample            | $\text{LiZr}_2(\text{PO}_4)_3$ | $\text{Li}_{0.85}\text{Ga}_{0.05}\text{Zr}_2(\text{PO}_4)_3$ |
|-------------------|--------------------------------|--------------------------------------------------------------|
| $R_p$             | 8.22%                          | 7.52%                                                        |
| $a, \text{\AA}$   | 8.8473                         | 8.8541                                                       |
| $c, \text{\AA}$   | 22.1636                        | 22.1458                                                      |
| $V, \text{\AA}^3$ | 1502.441                       | 1503.526                                                     |

|               |           |           |
|---------------|-----------|-----------|
| <P-O1>, Å     | 1.4366(2) | 1.4169(2) |
| <P-O2>, Å     | 1.5395(2) | 1.4990(2) |
| <Zr-O1>,<br>Å | 2.1015(3) | 2.1714(3) |
| <Zr-O2>,<br>Å | 2.0385(3) | 2.0627(3) |

**Table S3** CPE<sub>1</sub>, R<sub>1</sub>, CPE<sub>2</sub>, R<sub>2</sub> and W fitting values for LiZr<sub>2</sub>(PO<sub>4</sub>)<sub>3</sub>, Li<sub>0.94</sub>Ga<sub>0.02</sub>Zr<sub>2</sub>(PO<sub>4</sub>)<sub>3</sub>, Li<sub>0.85</sub>Ga<sub>0.05</sub>Zr<sub>2</sub>(PO<sub>4</sub>)<sub>3</sub> and Li<sub>0.7</sub>Ga<sub>0.1</sub>Zr<sub>2</sub>(PO<sub>4</sub>)<sub>3</sub>

| Sample                                                                                | CPE <sub>1</sub> | R <sub>1</sub> | CPE <sub>2</sub> | R <sub>2</sub> | W                         |
|---------------------------------------------------------------------------------------|------------------|----------------|------------------|----------------|---------------------------|
| LiZr <sub>2</sub> (PO <sub>4</sub> ) <sub>3</sub>                                     | 119.8 pF         | 2302 Ω         | 29.81 nF         | 826.3 Ω        | 43.15 Ω S <sup>-1/2</sup> |
| Li <sub>0.94</sub> Ga <sub>0.02</sub> Zr <sub>2</sub> (PO <sub>4</sub> ) <sub>3</sub> | 19.04 pF         | 578.3 Ω        | 1.224nF          | 354.5 Ω        | 15.27 Ω S <sup>-1/2</sup> |
| Li <sub>0.85</sub> Ga <sub>0.05</sub> Zr <sub>2</sub> (PO <sub>4</sub> ) <sub>3</sub> | 10.94 pF         | 193.7 Ω        | 1.061 nF         | 367.5 Ω        | 16.58 Ω S <sup>-1/2</sup> |
| Li <sub>0.7</sub> Ga <sub>0.1</sub> Zr <sub>2</sub> (PO <sub>4</sub> ) <sub>3</sub>   | 53.24 pF         | 1341 Ω         | 3.478 nF         | 746.2 Ω        | 35.53 Ω S <sup>-1/2</sup> |
